# Supplementary material for: Greenhouse gas flux with reflooding of a drained salt marsh soil
Source: PeerJ. 2018 Nov 15;6:e5659. doi: 10.7717/peerj.5659 (PMC6240435; doi:10.7717/peerj.5659)
Supplement: Data S1 [file peerj-06-5659-s001.xlsx]

## Sheet: Metadata
Metadata
The experiment was performed from June 8 through June 15, 2016
Daily flooding pattern:
8:00-11:00	Flooded
11:00-21:00	Drained
21:00-23:00	Flooded
23:00-8:00	Drained
This flooding pattern was maintained for 5 consecutive days, however gas samples were collected on days 1, 2, and 5 only.
On sampling days, all cores were sampled at the following times:
Sample 1: 11:00-12:00
Sample 2: 15:30-16:30
Sample 3: 20:00-21:00
Ambient temperature in the lab varied from 23 to 25C.
Core locations:
Cores 1-5: Lower Crown
Cores 5-10: Middle Crown
Cores 11-14: High Crown

## Sheet: GC results and flux values
					Original sample concentrations			Final concentration minus initial concentration			FLUX - micromol per m2 per 20 min period			Hourly flux - micromol per m2 per hour
Sample ID	Core No.	Time (min)	Date	Period (1,2,3)	N2O (ppm)	CH4 (ppm)	CO2 (ppm)	N2O	CH4	CO2	N2O	CH4	CO2	N2O	CH4	CO2											Notes	Daily Max Temp	Daily Min Temp	Description
1	-	-	2016-06-08	-	0.330882	1.99072	608.175	-0.00136438	0.0173228	1370.11																		25	23	ambiant air
2	1	0	2016-06-08	Background - no flooding	0.330705	1.97513	550.792	0.000215945	0.0164567	1323.53	-0.00763914	0.0969902	7671.24
3	2	0	2016-06-08	Background - no flooding	0.329704	1.96387	537.686	-0.00123678	0.024252	1125.92	0.00117583	0.0896071	7206.67
4	3	0	2016-06-08	Background - no flooding	0.33261	1.95521	839.964	0.000991385	0.0147244	1250.92	-0.00753598	0.147773	6860.52
5	4	0	2016-06-08	Background - no flooding	0.331314	1.95694	531.408	-0.00240484	0.000866142	1135.63	0.00604476	0.0897791	7627.25
6	5	0	2016-06-08	Background - no flooding	0.333385	1.97946	685.269	0.0213393	-0.00866142	1354.39	-0.0142831	0.00514427	6744.85
7	6	0	2016-06-08	Background - no flooding	0.332492	1.99765	517.747	0.0313906	-0.0216536	1533.64	0.147143	-0.0597241	9339.08
8	7	0	2016-06-08	Background - no flooding	0.33099	1.99419	487.848	0.0288287	0.0155906	1323.16	0.231458	-0.159662	11308.3
9	8	0	2016-06-08	Background - no flooding	0.332178	1.9734	597.927	0.0386051	0.00173228	1253.45	0.222612	0.120389	10217.3
10	9	0	2016-06-08	Background - no flooding	0.33208	1.99332	557.904	0.0267968	-0.0103937	1429.21	0.289346	0.0129835	9394.63
11	10	0	2016-06-08	Background - no flooding	0.332335	1.98033	681.399	0.271365	-0.0129921	1037.19	0.189769	-0.0736059	10121.3
12	11	0	2016-06-08	Background - no flooding	0.336889	1.97686	570.27	0.0947803	-0.048504	928.362	2.27135	-0.108745	8681.39
13	12	0	2016-06-08	Background - no flooding	0.333719	1.98119	628.125	0.0633112	-0.0129921	922.763	0.889318	-0.45511	8710.77
14	13	0	2016-06-08	Background - no flooding	0.335976	1.97167	598.245	0.0252165	0.0103937	499.805	0.599688	-0.123062	8740.48
15	14	0	2016-06-08	Background - no flooding	0.334318	1.98379	558.507	4.90785e-05	-0.0268504	1309.69	0.224141	0.0923863	4442.61
16	1	20	2016-06-08	Background - no flooding	0.329341	1.99245	1920.91	-0.00185517	-0.0164567	1213.67	0.000274789	-0.150335	7332.92
17	2	20	2016-06-08	Background - no flooding	0.32992	1.98033	1861.22	-0.00120733	-0.036378	987.317	-0.0101014	-0.0896071	6608.44
18	3	20	2016-06-08	Background - no flooding	0.331373	1.97946	1965.89	-0.00374959	-0.0164567	1256.36	-0.00735655	-0.22166	6015.96
19	4	20	2016-06-08	Background - no flooding	0.332305	1.97167	1782.33	-0.00363181	-0.0233858	1085.54	-0.0228624	-0.100341	7660.37
20	5	20	2016-06-08	Background - no flooding	0.33098	1.98033	1820.9	0.0200829	-0.018189	1427.55	-0.0215703	-0.138895	6447.36
21	6	20	2016-06-08	Background - no flooding	0.353831	1.98899	1872.14	0.0208485	-0.00433071	1172.91	0.13848	-0.125421	9843.55
22	7	20	2016-06-08	Background - no flooding	0.362381	1.97253	2021.49	-0.00808813	-0.00173228	-207.177	0.153726	-0.0319324	8648.41
23	8	20	2016-06-08	Background - no flooding	0.361007	1.98899	1921.09	0.0391941	-0.024252	1216.95	-0.0624556	-0.0133765	-1599.8
24	9	20	2016-06-08	Background - no flooding	0.370685	1.99505	1811.36	0.0249319	-0.0571654	1365.95	0.29376	-0.181769	9121.04
25	10	20	2016-06-08	Background - no flooding	0.359132	1.96993	2110.61	0.294726	-0.0207874	1115.63	0.176562	-0.404832	9673.34
26	11	20	2016-06-08	Background - no flooding	0.608254	1.96387	1607.46	0.0914626	0.0277165	773.077	2.46689	-0.173993	9337.97
27	12	20	2016-06-08	Background - no flooding	0.428499	1.93269	1556.49	0.0635272	0.00779528	747.576	0.858189	0.260063	7253.74
28	13	20	2016-06-08	Background - no flooding	0.399288	1.95867	1521.01	0.0276115	-0.024252	466.685	0.601734	0.0738375	7081.1
29	14	20	2016-06-08	Background - no flooding	0.359534	1.99419	1058.31	-0.00436798	-1.93669	1195.71	0.24543	-0.215568	4148.21
30	1	40	2016-06-08	Background - no flooding	0.32939	1.9656	3230.6	0.00225761	-1.93496	1054.38	-0.0244562	-10.8435	6694.77
31	2	40	2016-06-08	Background - no flooding	0.328065	1.96387	3074.89	0.000824518	-0.0381103	667.689	0.0122927	-10.5359	5741.15
32	3	40	2016-06-08	Background - no flooding	0.330166	1.94308	2953.2	-0.00182572	-1.9263	798.885	0.00502399	-0.232215	4068.39
33	4	40	2016-06-08	Background - no flooding	0.328556	1.95521	3038.69	-0.00186498	-1.92803	869.257	-0.0111319	-11.7452	4871.04
34	5	40	2016-06-08	Background - no flooding	0.327349	1.95694	2906.45	0.0130451	-1.94189	843.452	-0.0110767	-11.4511	5162.77
35	6	40	2016-06-08	Background - no flooding	0.373914	1.9708	3299.69	0.0300753	-1.93929	1228.27	0.089951	-13.3901	5815.95
36	7	40	2016-06-08	Background - no flooding	0.383229	1.9682	3194.4	0.0548304	-1.95835	2495.88	0.221759	-14.2993	9056.63
37	8	40	2016-06-08	Background - no flooding	0.352918	1.98726	1713.91	-0.0190326	0.0190551	-475.842	0.423395	-15.1221	19272.9
38	9	40	2016-06-08	Background - no flooding	0.409879	1.9708	3028.3	0.0231356	-1.88386	1199.98	-0.14265	0.142818	-3566.44
39	10	40	2016-06-08	Background - no flooding	0.384064	1.91277	3476.56	0.204922	-0.0571654	858.578	0.163841	-13.3411	8497.96
40	11	40	2016-06-08	Background - no flooding	0.90298	1.94308	2723.09	0.0740888	-0.0355118	650.622	1.71522	-0.47848	7186.39
41	12	40	2016-06-08	Background - no flooding	0.519962	1.96041	2329.56	0.0537507	-0.0476378	633.52	0.695171	-0.333205	6104.75
42	13	40	2016-06-08	Background - no flooding	0.462815	1.96647	2268.58	0.0757477	-0.0294488	1286.6	0.509131	-0.451229	6000.74
43	14	40	2016-06-08	Background - no flooding	0.387146	1.96993	1525				0.673297	-0.261761	11436.2
44	1	60	2016-06-08	Background - no flooding	0.325022	0.0289089	4426.31							-0.0318206	-10.8968	21698.9
45	2	60	2016-06-08	Background - no flooding	0.330323	0.0289089	4129.27							0.00336714	-10.5359	19556.3
46	3	60	2016-06-08	Background - no flooding	0.33099	1.90497	3620.89							-0.00986855	-0.306102	16944.9
47	4	60	2016-06-08	Background - no flooding	0.32673	0.0289089	3837.57							-0.0279495	-11.7558	20158.7
48	5	60	2016-06-08	Background - no flooding	0.325484	0.0289089	3775.7							-0.0469301	-11.5849	18355
49	6	60	2016-06-08	Background - no flooding	0.386959	0.0289089	4143.14							0.375574	-13.5753	24998.6
50	7	60	2016-06-08	Background - no flooding	0.413305	0.0289089	4422.67							0.606943	-14.4909	29013.3
51	8	60	2016-06-08	Background - no flooding	0.407749	0.0289089	4209.79							0.583551	-15.0151	27890.4
52	9	60	2016-06-08	Background - no flooding	0.390846	1.98985	2552.46							0.440456	-0.025967	14949.2
53	10	60	2016-06-08	Background - no flooding	0.407199	0.0289089	4676.53							0.530172	-13.8195	28292.6
54	11	60	2016-06-08	Background - no flooding	1.1079	1.88592	3581.67							6.45346	-0.761218	25205.8
55	12	60	2016-06-08	Background - no flooding	0.594051	1.92489	2980.19							2.44268	-0.528253	22069.3
56	13	60	2016-06-08	Background - no flooding	0.516566	1.91883	2902.1							1.71055	-0.500454	21822.3
57	14	60	2016-06-08	Background - no flooding	0.462893	1.94048	2811.6	0.0170204	0.0337795	164.068				1.14287	-0.384943	20027
58	6	0	2016-06-10	1	0.335388	1.97167	728.147	0.0490392	0.0268504	621.742	0.117363	0.232924	1131.32
59	7	0	2016-06-10	1	0.330961	1.963	548.795	0.0214865	0.0710237	661.704	0.361589	0.197981	4584.4
60	8	0	2016-06-10	1	0.332266	1.9734	756.499	0.0452013	0.024252	480.835	0.165917	0.548437	5109.6
61	9	0	2016-06-10	1	0.333817	1.98899	1064.19	0.02663	0.0268504	585.846	0.338784	0.181769	3603.87
62	10	0	2016-06-10	1	0.333415	1.9708	804.395	0.0701233	0.0329134	270.883	0.188587	0.190148	4148.83
63	11	0	2016-06-10	1	0.335702	1.97167	961.583	0.0104144	0.0909449	158.471	0.586939	0.275489	2267.32
64	12	0	2016-06-10	1	0.332541	1.96474	754.259	0.0236754	-0.0285827	263.63	0.0977182	0.853331	1486.92
65	13	0	2016-06-10	1	0.331991	2.0323	584.397	0.0210645	0.0493701	290.026	0.224256	-0.270737	2497.12
66	14	0	2016-06-10	1	0.330961	1.95867	645.264	0.0232926	-0.0112598	295.593	0.187235	0.438835	2577.94
67	6	20	2016-06-10	1	0.352408	2.00545	892.216	0.037918	0.00173228	372.286	0.160612	-0.0776413	2038.23
68	7	20	2016-06-10	1	0.38	1.98985	1170.54	0.0227331	-0.054567	323.679	0.279587	0.0127729	2745.04
69	8	20	2016-06-10	1	0.353753	2.04442	1418.2	0.02716	-0.000866142	251.004	0.175543	-0.42136	2499.41
70	9	20	2016-06-10	1	0.379018	2.01324	1545.03	0.0297612	-0.00692914	356.889	0.203565	-0.00649174	1881.28
71	10	20	2016-06-10	1	0.360045	1.99765	1390.24	0.0962232	0.00346457	160.404	0.210762	-0.0490706	2527.4
72	11	20	2016-06-10	1	0.405825	2.00458	1232.47	0.0321562	-0.0398425	460.121	0.805398	0.0289988	1342.6
73	12	20	2016-06-10	1	0.342955	2.05568	912.73	0.0346298	-0.00952756	249.643	0.30172	-0.37384	4317.29
74	13	20	2016-06-10	1	0.355667	2.00371	848.027	0.0401658	0.00866142	438.604	0.328016	-0.0902458	2364.64
75	14	20	2016-06-10	1	0.352025	2.00804	935.29	0.0583739	-0.00173228	272.127	0.357021	0.0769886	3898.61
76	6	40	2016-06-10	1	0.375701	1.99419	1187.81	0.000225761	-0.0129921	-103.523	0.402512	-0.0119448	1876.43
77	7	40	2016-06-10	1	0.417918	1.99159	1542.82	0.0246668	0.00346457	311.886	0.00166464	-0.0957971	-763.326
78	8	40	2016-06-10	1	0.376486	1.98985	1741.88	0.0485386	-0.0415748	453.755	0.190474	0.026753	2408.35
79	9	40	2016-06-10	1	0.406178	2.01237	1796.03	0.0611223	0.00259843	507.472	0.363797	-0.311604	3400.9
80	10	40	2016-06-10	1	0.389806	1.99072	1747.13	0.181021	0.024252	242.478	0.432854	0.0184015	3593.8
81	11	40	2016-06-10	1	0.502048	2.00804	1392.87	0.0828641	-0.0259843	331.917	1.51516	0.202992	2029.57
82	12	40	2016-06-10	1	0.375112	2.01584	1372.85	0.0271208	-0.00952756	649.41	0.777509	-0.243809	3114.36
83	13	40	2016-06-10	1	0.390297	1.99419	1097.67	0.0804788	-0.0112598	31.4684	0.25689	-0.0902458	6151.26
84	14	40	2016-06-10	1	0.392191	2.0167	1373.89				0.715351	-0.100085	279.713
85	6	60	2016-06-10	1	0.434075	1.99245	1459.94							0.680487	0.143338	5045.98
86	7	60	2016-06-10	1	0.418144	1.97859	1439.3							0.642841	0.114957	6566.11
87	8	60	2016-06-10	1	0.401153	1.99332	2053.77							0.531934	0.15383	10017.4
88	9	60	2016-06-10	1	0.454717	1.9708	2249.79							0.906146	-0.136327	8886.05
89	10	60	2016-06-10	1	0.450928	1.99332	2254.6							0.832204	0.159479	10270
90	11	60	2016-06-10	1	0.683069	2.0323	1635.35							2.9075	0.507479	5639.48
91	12	60	2016-06-10	1	0.457976	1.98985	1704.77							1.17695	0.235682	8918.57
92	13	60	2016-06-10	1	0.417417	1.98466	1747.08							0.809161	-0.451229	11013
93	14	60	2016-06-10	1	0.47267	2.00545	1405.36	0.0949177	0.0753544	372.703				1.25961	0.415738	6756.27
94	6	0	2016-06-10	2	0.331903	1.90064	510.314	0.215896	-0.018189	467.425	0.654497	0.519599	2569.94
95	7	0	2016-06-10	2	0.356158	1.98466	573.834	0.138136	0.0277165	366.86	1.5919	-0.134116	3446.54
96	8	0	2016-06-10	2	0.338038	1.95607	748.985	0.236931	0.0190551	384.1	1.06667	0.214024	2832.85
97	9	0	2016-06-10	2	0.346656	2.00545	1135.7	0.150376	-0.0277165	558.63	1.7758	0.142818	2878.84
98	10	0	2016-06-10	2	0.347098	2.02623	831.818	0.909463	-0.0268504	407.391	1.06493	-0.196282	3956.09
99	11	0	2016-06-10	2	0.412824	2.00198	573.011	0.232926	-0.0320473	485.914	7.6123	-0.224741	3409.91
100	12	0	2016-06-10	2	0.345959	2.01584	769.521	0.0653234	0.0562992	335.628	2.18553	-0.300698	4559.3
101	13	0	2016-06-10	2	0.337645	1.9708	872.047	0.229746	0.036378	357.589	0.618748	0.533271	3179.1
102	14	0	2016-06-10	2	0.345203	1.9734	490.274	0.0402051	0.00952756	270.634	2.04214	0.323352	3178.49
103	6	20	2016-06-10	2	0.426821	1.976	883.017	0.144507	0.0294488	350.597	0.27723	0.0656965	1866.13
104	7	20	2016-06-10	2	0.572054	1.96647	1041.26	0.0951828	-0.00779528	221.598	1.06552	0.21714	2585.11
105	8	20	2016-06-10	2	0.476174	1.98379	1115.85	0.239464	-0.0632284	506.879	0.73499	-0.0601943	1711.16
106	9	20	2016-06-10	2	0.583587	2.0245	1519.8	0.117788	-0.00346457	537.326	1.79478	-0.473897	3799.06
107	10	20	2016-06-10	2	0.497474	1.99852	1390.45	0.816695	0.000866142	469.714	0.83415	-0.0245353	3805.22
108	11	20	2016-06-10	2	1.32229	1.97513	980.402	0.181011	0.0718898	476.47	6.83582	0.0072497	3931.55
109	12	20	2016-06-10	2	0.578885	1.98379	1255.43	0.070938	-0.0199213	307.983	1.69842	0.674538	4470.69
110	13	20	2016-06-10	2	0.402969	2.0271	1207.68	0.232779	-0.0294488	364.244	0.67193	-0.188696	2917.24
111	14	20	2016-06-10	2	0.574949	2.00978	847.863	0.034512	0.0129921	288.943	2.0691	-0.261761	3237.65
112	6	40	2016-06-10	2	0.467026	1.98552	1153.65	0.108385	-0.0112598	226.659	0.237974	0.0895861	1992.38
113	7	40	2016-06-10	2	0.71656	1.99592	1391.86	0.106677	0	299.708	0.799173	-0.0830242	1671.26
114	8	40	2016-06-10	2	0.571357	1.976	1337.44	0.191327	0.00606299	426.646	0.823747	0	2314.31
115	9	40	2016-06-10	2	0.823051	1.96127	2026.68	0.0934159	-0.0138583	460.491	1.434	0.0454422	3197.71
116	10	40	2016-06-10	2	0.615262	1.99505	1927.77	0.366086	0.0311811	231.708	0.66155	-0.0981411	3261.09
117	11	40	2016-06-10	2	2.13898	1.976	1450.12	0.101612	-0.0684252	311.278	3.06418	0.260989	1939.42
118	12	40	2016-06-10	2	0.759897	2.05568	1731.91	0.0307624	-0.000866142	205.964	0.95342	-0.64203	2920.7
119	13	40	2016-06-10	2	0.473907	2.00718	1515.66	-0.0537802	0.00346457	-74.6123	0.291383	-0.00820416	1950.9
120	14	40	2016-06-10	2	0.807728	1.98033	1212.11				-0.478035	0.0307954	-663.205
121	6	60	2016-06-10	2	0.501538	1.99852	1442.59							1.1697	0.674882	6428.45
122	7	60	2016-06-10	2	0.824945	1.98466	1618.51							3.45659	0	7702.92
123	8	60	2016-06-10	2	0.678034	1.976	1637.15							2.62541	0.15383	6858.32
124	9	60	2016-06-10	2	1.01438	1.96733	2453.32							5.00459	-0.285637	9875.62
125	10	60	2016-06-10	2	0.708678	1.98119	2388.26							2.56063	-0.318959	11022.4
126	11	60	2016-06-10	2	2.50507	2.00718	1681.82							17.5123	0.0434982	9280.88
127	12	60	2016-06-10	2	0.861509	1.98726	2043.18							4.83737	-0.26819	11950.7
128	13	60	2016-06-10	2	0.504669	2.00631	1721.62							1.58206	0.336371	8047.24
129	14	60	2016-06-10	2	0.753948	1.98379	1137.49	0.00559494	0.0294488	365.476				3.6332	0.0923863	5752.93
130	6	0	2016-06-10	3	0.330784	1.9656	439.735	0.0237147	0.0493701	407.799	0.0385794	0.203062	2520.11
131	7	0	2016-06-10	3	0.332796	1.96993	537.224	0.0307329	0.0268504	268.438	0.17486	0.364029	3006.89
132	8	0	2016-06-10	3	0.332973	1.96647	962.795	0.126367	-0.0173228	429.443	0.237316	0.207336	2072.85
133	9	0	2016-06-10	3	0.34056	1.99938	937.847	0.0151751	-0.157638	617.54	0.947124	-0.129835	3218.68
134	10	0	2016-06-10	3	0.332865	2.13277	602.834	1.13926	0.036378	488.613	0.107466	-1.11636	4373.28
135	11	0	2016-06-10	3	0.40928	1.96474	1080.47	0.251056	-0.0155906	518.111	9.53571	0.304487	4089.75
136	12	0	2016-06-10	3	0.349669	1.97167	566.451	0.0197197	-0.0259843	342.875	2.35564	-0.146285	4861.41
137	13	0	2016-06-10	3	0.334622	1.97773	588.467	0.297838	-0.00519685	368.458	0.186787	-0.246125	3247.74
138	14	0	2016-06-10	3	0.352261	1.976	489.872	0.00305268	-0.0164567	307.567	2.64738	-0.0461931	3275.11
139	6	20	2016-06-10	3	0.336379	1.99505	805.211	0.0204853	-0.0441732	396.793	0.0210495	-0.113476	2120.8
140	7	20	2016-06-10	3	0.356511	2.0193	945.022	0.0266202	-0.018189	403.543	0.151048	-0.32571	2925.74
141	8	20	2016-06-10	3	0.363706	1.99332	1231.23	0.111595	-0.00433071	432.644	0.205558	-0.140453	3116.11
142	9	20	2016-06-10	3	0.466928	1.98206	1367.29	0.00858873	0.00606299	595.153	0.836403	-0.0324587	3242.67
143	10	20	2016-06-10	3	0.34804	1.97513	1220.37	0.980254	-0.0320473	431.331	0.0608234	0.0429368	4214.74
144	11	20	2016-06-10	3	1.54854	2.00111	1569.08	0.291153	0.0588977	528.894	8.20483	-0.268239	3610.28
145	12	20	2016-06-10	3	0.600725	1.95607	1084.56	0.019121	0.0415748	327.661	2.73187	0.552633	4962.59
146	13	20	2016-06-10	3	0.354342	1.95174	931.342	0.348104	0.018189	449.836	0.181115	0.3938	3103.63
147	14	20	2016-06-10	3	0.650098	1.9708	858.33	0.00252263	-0.00606299	387.176	3.09418	0.161676	3998.45
148	6	40	2016-06-10	3	0.339432	1.97859	1112.78	0.0169124	0.036378	379.8	0.0173946	-0.0418068	2669.74
149	7	40	2016-06-10	3	0.376996	1.97513	1341.82	0.0180805	0.00173228	265.885	0.124703	0.268232	2800.44
150	8	40	2016-06-10	3	0.390326	1.97513	1634.78	0.0816764	0.0588977	438.99	0.139616	0.0133765	2053.14
151	9	40	2016-06-10	3	0.578522	1.97773	1799.93	0.00874578	0.0692914	604.67	0.612165	0.441439	3290.24
152	10	40	2016-06-10	3	0.356629	1.98119	1815.53	0.860532	0.0632284	410.173	0.0619356	0.490706	4282.14
153	11	40	2016-06-10	3	2.52879	1.96907	2000.41	0.27748	0	485.424	7.20274	0.529228	3433.19
154	12	40	2016-06-10	3	0.891878	2.01497	1613.46	0.00240484	-0.0225197	89.2582	2.60358	0	4554.71
155	13	40	2016-06-10	3	0.373463	1.99332	1259	0.238619	-0.0129921	347.494	0.0227789	-0.213308	845.46
156	14	40	2016-06-10	3	0.998202	1.98899	1308.17				2.12101	-0.115483	3088.76
157	6	60	2016-06-10	3	0.341954	1.97253	1499.96							0.0770235	0.0477792	7310.65
158	7	60	2016-06-10	3	0.393909	2.01151	1721.62							0.450611	0.306551	8733.08
159	8	60	2016-06-10	3	0.408406	1.97686	1900.66							0.58249	0.080259	7242.1
160	9	60	2016-06-10	3	0.660199	2.03663	2238.92							2.39569	0.279145	9751.59
161	10	60	2016-06-10	3	0.365374	2.05048	2420.2							0.230225	-0.582713	12870.2
162	11	60	2016-06-10	3	3.38932	2.0323	2410.58							24.9433	0.565477	11133.2
163	12	60	2016-06-10	3	1.16936	2.01497	2098.88							7.69109	0.406348	14378.7
164	13	60	2016-06-10	3	0.375867	1.9708	1348.26							0.390681	-0.0656333	7196.83
165	14	60	2016-06-10	3	1.23682	1.976	1655.66	0.0101494	0.0562992	578.072				7.86257	0	10362.3
166	1	0	2016-06-11	1	0.334396	2.04009	557.643	0.0147432	-0.0407087	693.117	0.0568264	0.315218	3236.61
167	2	0	2016-06-11	1	0.3342	2.0834	513.574	0.00720472	-0.0129921	490.512	0.0802769	-0.22166	3774.04
168	3	0	2016-06-11	1	0.334681	2.06174	560.89	0.00664522	-0.0355118	381.123	0.0439001	-0.0791642	2988.81
169	4	0	2016-06-11	1	0.333169	2.0808	541.881	0.022792	-0.0112598	449.526	0.0405179	-0.216526	2323.82
170	5	0	2016-06-11	1	0.335751	2.05568	794.566	0.0229393	-0.00519685	281.604	0.135369	-0.0668755	2669.87
171	6	0	2016-06-11	1	0.336075	2.04442	507.121	0.0223209	0.118661	457.331	0.158176	-0.0358344	1941.78
172	7	0	2016-06-11	1	0.338843	2.07733	685.324	0.0337758	-0.00433071	386.498	0.164582	0.874947	3372.12
173	8	0	2016-06-11	1	0.338322	2.04269	537.494	0.0491472	0.000866142	244.393	0.260813	-0.0334413	2984.5
174	9	0	2016-06-11	1	0.344742	2.073	555.179	0.0198768	0.00692914	313.187	0.368359	0.00649174	1831.73
175	10	0	2016-06-11	1	0.337812	2.03489	518.293	0.0350028	0.0147244	113.861	0.140763	0.0490706	2217.92
176	11	0	2016-06-11	1	0.338401	2.0297	568.205	0.0529262	0.0199213	141.073	0.292977	0.123245	953.032
177	12	0	2016-06-11	1	0.341748	2.0167	536.981	0.00865744	-0.018189	122.052	0.496604	0.18692	1323.68
178	13	0	2016-06-11	1	0.336683	2.02277	477.27	0.0605432	-0.0138583	30.8414	0.0820039	-0.172287	1156.09
179	14	0	2016-06-11	1	0.3459	2.05308	672.903	0.0475865	-0.0554331	1034.53	0.538149	-0.123182	274.139
180	1	20	2016-06-11	1	0.344546	2.09639	1135.72	0.0201909	-0.00866142	890.204	0.266435	-0.310369	5792.31
181	2	20	2016-06-11	1	0.348943	2.04269	1206.69	0.164344	0.0138583	1811.44	0.10994	-0.0471616	4847.18
182	3	20	2016-06-11	1	0.341886	2.04875	1051.4	0.0295452	0.00346457	601.052	1.00139	0.0844418	11037.6
183	4	20	2016-06-11	1	0.339814	2.04529	923.004	0.0368776	0.0346457	765.69	0.180146	0.0211245	3664.79
184	5	20	2016-06-11	1	0.358543	2.04442	1244.09	0.0290643	0.00606299	254.447	0.219026	0.205771	4547.65
185	6	20	2016-06-11	1	0.359014	2.03922	788.726	0.0187774	-0.150709	367.264	0.20041	0.0418068	1754.52
186	7	20	2016-06-11	1	0.361164	2.196	1142.66	0.0227135	0.000866142	317.932	0.138455	-1.11125	2708.01
187	8	20	2016-06-11	1	0.372098	2.03836	923.992	0.0440037	-0.0329134	252.589	0.175391	0.00668825	2455.04
188	9	20	2016-06-11	1	0.393889	2.07387	799.572	0.0156266	-0.00173228	356.121	0.329809	-0.246686	1893.16
189	10	20	2016-06-11	1	0.357689	2.04182	831.48	0.0401854	-0.018189	98.5509	0.110664	-0.0122676	2521.97
190	11	20	2016-06-11	1	0.373404	2.04442	682.066	0.051817	0.0129921	185.341	0.336356	-0.152244	824.881
191	12	20	2016-06-11	1	0.394674	2.03663	678.054	0.0225368	0.0493701	242.881	0.486196	0.121904	1739.05
192	13	20	2016-06-11	1	0.345341	2.00458	599.322	0.0782899	0.0164567	174.713	0.21347	0.467637	2300.59
193	14	20	2016-06-11	1	0.406443	2.03922	703.745	0.0625456	-0.0251181	919.892	0.695894	0.146278	1552.97
194	1	40	2016-06-11	1	0.392132	2.04096	2170.25	0.026149	0.0164567	916.745	0.350191	-0.140636	5150.45
195	2	40	2016-06-11	1	0.369134	2.03403	2096.9	0.0457019	-2.0337	1193.62	0.142382	0.0896071	4991.7
196	3	40	2016-06-11	1	0.50623	2.06261	2862.85	0.303197	-0.0207874	1624.7	0.278472	-12.3918	7273
197	4	40	2016-06-11	1	0.36936	2.04875	1524.06	0.029398	0.0294488	719.759	1.84868	-0.126747	9906.26
198	5	40	2016-06-11	1	0.39542	2.07907	2009.78	0.00822555	-0.00433071	132.122	0.174603	0.174905	4274.86
199	6	40	2016-06-11	1	0.388078	2.04529	1043.17	-0.00784274	-0.0372441	-151.839	0.0567185	-0.029862	911.033
200	7	40	2016-06-11	1	0.379941	2.04529	1509.92	-0.0140659	-0.0259843	-81.3826	-0.0578282	-0.274618	-1119.58
201	8	40	2016-06-11	1	0.394812	2.03922	1241.92	0.0247454	-0.00259843	183.259	-0.108615	-0.200648	-628.427
202	9	40	2016-06-11	1	0.437893	2.04096	1052.16	0.00766605	-0.0103937	246.841	0.185467	-0.0194752	1373.53
203	10	40	2016-06-11	1	0.373315	2.04009	1187.6	0.0347279	0.00259843	164.5	0.0542893	-0.0736059	1748.07
204	11	40	2016-06-11	1	0.413589	2.02623	780.617	-0.0160977	-0.0398425	-32.1537	0.290676	0.0217491	1376.88
205	12	40	2016-06-11	1	0.446491	2.04962	863.395	0.00947214	-0.0199213	143.15	-0.151044	-0.37384	-301.696
206	13	40	2016-06-11	1	0.367877	2.05395	842.203	0.0430811	-0.030315	126.913	0.0897208	-0.188696	1355.92
207	14	40	2016-06-11	1	0.484733	2.05568	878.458				0.382934	-0.26946	1128.09
208	1	60	2016-06-11	1	0.454678	2.01584	3090.14							0.673453	-0.135786	14179.4
209	2	60	2016-06-11	1	0.395283	2.05048	3013.64							0.332599	-0.179214	13612.9
210	3	60	2016-06-11	1	0.551932	0.0289089	4056.46							1.32376	-12.3866	21299.4
211	4	60	2016-06-11	1	0.672557	2.02796	3148.75							2.06934	-0.322148	15894.9
212	5	60	2016-06-11	1	0.424818	2.10852	2729.54							0.528998	0.3138	11492.4
213	6	60	2016-06-11	1	0.396304	2.04096	1175.29							0.415304	-0.0238896	4607.33
214	7	60	2016-06-11	1	0.372098	2.00804	1358.08							0.245209	-0.510918	4960.55
215	8	60	2016-06-11	1	0.380746	2.01324	1160.54							0.327589	-0.227401	4811.11
216	9	60	2016-06-11	1	0.462638	2.03836	1235.42							0.883634	-0.25967	5098.42
217	10	60	2016-06-11	1	0.380981	2.0297	1434.44							0.305716	-0.0368029	6487.96
218	11	60	2016-06-11	1	0.448317	2.02883	945.117							0.920009	-0.0072497	3154.8
219	12	60	2016-06-11	1	0.430394	2.00978	831.242							0.831756	-0.0650157	2761.03
220	13	60	2016-06-11	1	0.37735	2.03403	985.353							0.385195	0.106654	4812.6
221	14	60	2016-06-11	1	0.527814	2.02537	1005.37	0.0224779	-0.0329134	411.083				1.61698	-0.246363	2955.19
222	1	0	2016-06-11	2	0.335957	2.04442	524.104	0.0344923	0.0294488	653.588	0.125853	-0.184281	2301.64
223	2	0	2016-06-11	2	0.336408	2.04096	466.748	0.031528	-0.00606299	695.449	0.187812	0.16035	3558.8
224	3	0	2016-06-11	2	0.335839	2.03836	509.893	0.0788691	-0.00259843	696.444	0.192108	-0.0369433	4237.54
225	4	0	2016-06-11	2	0.339324	2.04009	568.061	0.0232534	0.0467717	615.177	0.480888	-0.0158434	4246.42
226	5	0	2016-06-11	2	0.3347	2.0271	497.613	0.00142328	-0.00433071	246.201	0.138109	0.277791	3653.71
227	6	0	2016-06-11	2	0.336988	2.05482	495.447	0.00148217	-0.0623622	383.308	0.00981407	-0.029862	1697.66
228	7	0	2016-06-11	2	0.335829	2.07474	640.393	0.00267968	-0.0190551	260.49	0.0109287	-0.459826	2826.31
229	8	0	2016-06-11	2	0.333768	2.05915	496.552	0.0198964	-0.0311811	202.696	0.0206922	-0.147142	2011.48
230	9	0	2016-06-11	2	0.337037	2.05915	565.921	0.00343549	-0.0251181	336.513	0.149124	-0.233703	1519.21
231	10	0	2016-06-11	2	0.335604	2.04442	565.998	0.0111899	-0.0311811	129.537	0.0243294	-0.177881	2383.11
232	11	0	2016-06-11	2	0.336457	2.07041	577.785	0.0204363	0.0268504	222.151	0.0936605	-0.260989	1084.23
233	12	0	2016-06-11	2	0.33368	2.00978	559.84	0.000235577	-0.048504	183.836	0.191752	0.251936	2084.43
234	13	0	2016-06-11	2	0.336948	2.06781	537.792	0.00375941	-0.030315	156.875	0.0022314	-0.459433	1741.31
235	14	0	2016-06-11	2	0.337027	2.04182	622.96	0.0575788	0.048504	879.858	0.0334162	-0.26946	1394.42
236	1	20	2016-06-11	2	0.358435	2.01151	935.187	0.0399989	-0.0285827	695.791	0.322383	0.271572	4926.31
237	2	20	2016-06-11	2	0.370901	2.07041	1120.34	0.0317047	0.00779528	677.534	0.217795	-0.155633	3788.6
238	3	20	2016-06-11	2	0.367367	2.0323	1205.34	0.1001	-0.024252	879.196	0.193184	0.0474985	4128.38
239	4	20	2016-06-11	2	0.418193	2.03749	1264.5	0.0174425	-0.0355118	564.802	0.610342	-0.147871	5360.72
240	5	20	2016-06-11	2	0.357954	2.07387	1112.79	0.00192388	-0.0407087	277.419	0.103596	-0.210915	3354.52
241	6	20	2016-06-11	2	0.338411	2.05048	741.648	0.0035631	0.0216536	341.114	0.0132659	-0.280703	1912.92
242	7	20	2016-06-11	2	0.337311	2.01237	1023.7	0.00646854	-0.0216536	232.256	0.0262724	0.159662	2515.19
243	8	20	2016-06-11	2	0.336448	2.04009	757.042	0.0138892	-0.00346457	271.35	0.0499493	-0.167206	1793.46
244	9	20	2016-06-11	2	0.356933	2.02796	768.617	-0.00477043	-0.00779528	327.405	0.1041	-0.025967	2033.77
245	10	20	2016-06-11	2	0.339039	2.0193	902.511	0.0123776	-0.018189	166.051	-0.0337831	-0.0552044	2318.61
246	11	20	2016-06-11	2	0.347647	2.03922	707.322	0.0195234	-0.0112598	222.522	0.103602	-0.152244	1389.86
247	12	20	2016-06-11	2	0.354116	2.03663	781.991	0.00104046	-0.0112598	192.152	0.183187	-0.105651	2087.91
248	13	20	2016-06-11	2	0.337184	2.0193	721.628	0.00935435	0.00606299	142.385	0.00985534	-0.106654	1820.08
249	14	20	2016-06-11	2	0.340786	2.01151	779.835	-0.0190915	-0.0606299	-215.378	0.0831478	0.053892	1265.62
250	1	40	2016-06-11	2	0.416014	2.06001	1815.05	0.0242938	0.0355118	403.641	-0.106893	-0.339466	-1205.9
251	2	40	2016-06-11	2	0.4109	2.04182	1816.13	0.0343647	-0.00779528	716.061	0.132281	0.193363	2197.83
252	3	40	2016-06-11	2	0.399072	2.04009	1882.88	0.0678755	0.00952756	648.505	0.209393	-0.0474985	4363.13
253	4	40	2016-06-11	2	0.518293	2.01324	2143.7	0.0160388	0.0190551	492.107	0.413857	0.0580923	3954.12
254	5	40	2016-06-11	2	0.375396	2.03836	1677.59	0.0033177	0.00779528	86.724	0.0952593	0.113174	2922.77
255	6	40	2016-06-11	2	0.340335	2.00978	1019.07	0.00435817	0.0511024	212.888	0.0228769	0.0537516	597.998
256	7	40	2016-06-11	2	0.340875	2.03403	1364.82	0.00384775	-0.0112598	289.622	0.0321348	0.376802	1569.72
257	8	40	2016-06-11	2	0.342916	2.01844	989.299	0.0055655	-0.0112598	139.486	0.0297119	-0.0869473	2236.42
258	9	40	2016-06-11	2	0.370822	2.0245	1039.97	0.00992366	0.0138583	158.467	0.0417135	-0.0843927	1045.45
259	10	40	2016-06-11	2	0.334269	2.01151	1229.92	0.00348457	-0.0147244	99.8534	0.0702771	0.0981411	1122.23
260	11	40	2016-06-11	2	0.360025	2.02104	873.372	0.00946233	-0.0199213	168.425	0.0291662	-0.123245	835.783
261	12	40	2016-06-11	2	0.373639	2.02537	1004.51	0.00283673	-0.00519685	155.412	0.0887845	-0.18692	1580.32
262	13	40	2016-06-11	2	0.338224	2.00804	913.78	0.00527103	-0.0199213	186.319	0.0268698	-0.049225	1472.07
263	14	40	2016-06-11	2	0.350141	2.01757	922.221				0.0468525	-0.177074	1656.13
264	1	60	2016-06-11	2	0.396922	1.99938	1599.67							0.341343	-0.252174	6022.05
265	2	60	2016-06-11	2	0.435194	2.07733	2219.77							0.537887	0.198079	9545.23
266	3	60	2016-06-11	2	0.433436	2.0323	2598.94							0.594685	-0.0369433	12729.1
267	4	60	2016-06-11	2	0.586169	2.02277	2792.21							1.50509	-0.105622	13561.3
268	5	60	2016-06-11	2	0.391435	2.05741	2169.7							0.336964	0.180049	9931
269	6	60	2016-06-11	2	0.343652	2.01757	1105.79							0.0459569	-0.256813	4208.57
270	7	60	2016-06-11	2	0.345233	2.08513	1577.7							0.0693359	0.0766377	6911.23
271	8	60	2016-06-11	2	0.346764	2.00718	1278.92							0.100353	-0.401295	6041.36
272	9	60	2016-06-11	2	0.376388	2.01324	1179.45							0.294937	-0.344062	4598.42
273	10	60	2016-06-11	2	0.344192	2.02537	1388.38							0.0608234	-0.134944	5823.95
274	11	60	2016-06-11	2	0.36351	2.00631	973.226							0.226428	-0.536478	3309.88
275	12	60	2016-06-11	2	0.383102	2.00545	1172.94							0.463724	-0.0406348	5752.66
276	13	60	2016-06-11	2	0.341061	2.00285	1069.19							0.0389565	-0.615312	5033.46
277	14	60	2016-06-11	2	0.355412	1.99765	1108.54	0.00549679	0.0173228	372.855				0.163416	-0.392642	4316.16
278	1	0	2016-06-11	3	0.336349	1.97946	520.418	0.0193173	0.018189	718	0.0307764	0.0969902	2087.6
279	2	0	2016-06-11	3	0.337763	2.00111	434.335	0.0175308	-0.00866142	735.346	0.105183	0.0990395	3909.53
280	3	0	2016-06-11	3	0.337341	2.01151	493.885	0.0359254	0.0103937	786.584	0.10682	-0.0527761	4480.64
281	4	0	2016-06-11	3	0.338214	1.98726	590.431	0.0123874	0.0337795	476.128	0.219048	0.0633735	4796.04
282	5	0	2016-06-11	3	0.336929	1.98206	533.711	0.00288581	-0.00606299	275.684	0.0735724	0.200626	2827.86
283	6	0	2016-06-11	3	0.33471	2.01497	452.074	0.00102083	0.0233858	282.331	0.0198989	-0.0418068	1900.96
284	7	0	2016-06-11	3	0.338205	1.98639	921.814	-0.00105028	0.0459055	-206.212	0.00752707	0.172435	2081.76
285	8	0	2016-06-11	3	0.338578	1.98379	1513.35	0.00595812	-0.0285827	299.137	-0.00811014	0.354477	-1592.34
286	9	0	2016-06-11	3	0.335162	2.02104	614.008	0.00316065	0.0381103	380.705	0.0446562	-0.214228	2242.04
287	10	0	2016-06-11	3	0.332747	1.98119	478.821	0.0116218	-0.0129921	410.702	0.022383	0.269888	2696.07
288	11	0	2016-06-11	3	0.335751	2.0245	797.855	0.00817647	-0.00952756	292.699	0.0972755	-0.108745	3437.62
289	12	0	2016-06-11	3	0.332678	2.00371	624.139	-0.00175701	-0.0277165	225.257	0.0767194	-0.0893966	2746.38
290	13	0	2016-06-11	3	0.337174	2.0271	734.945	0.00293489	-0.0233858	192.21	-0.0166425	-0.262533	2133.65
291	14	0	2016-06-11	3	0.334298	2.02277	562.258	0.0260214	-0.00259843	888.874	0.0260873	-0.207869	1708.49
292	1	20	2016-06-11	3	0.341846	1.99678	893.273	0.0214767	0.054567	602.536	0.145693	-0.0145485	4976.79
293	2	20	2016-06-11	3	0.35708	2.0193	1152.33	0.0265514	0.0311811	817.264	0.116941	0.297118	3280.82
294	3	20	2016-06-11	3	0.354872	2.00285	1229.23	0.0346396	0.0381103	739.066	0.161784	0.189994	4979.78
295	4	20	2016-06-11	3	0.37414	1.99765	1377.02	0.0122009	0.0511024	727.686	0.211208	0.232369	4506.3
296	5	20	2016-06-11	3	0.349316	2.01584	1009.84	0.000559494	-0.00692914	345.74	0.0724647	0.303512	4321.94
297	6	20	2016-06-11	3	0.337596	2.00891	727.759	0.00341586	-0.00692914	417.785	0.00385794	-0.0477792	2384.02
298	7	20	2016-06-11	3	0.339225	2.00978	1204.14	0.0048784	-0.0268504	731.273	0.0251867	-0.0510918	3080.52
299	8	20	2016-06-11	3	0.337527	2.0297	1307.13	0.00921693	0.0285827	357.774	0.0376704	-0.207336	5646.81
300	9	20	2016-06-11	3	0.34112	1.99245	913.146	0.00138401	0.0268504	485.967	0.069081	0.214228	2681.52
301	10	20	2016-06-11	3	0.335908	2.0193	859.527	0.011396	0.0329134	212.536	0.00980126	0.190148	3441.51
302	11	20	2016-06-11	3	0.347373	2.01151	1208.56	0.00153125	0.0251181	252.314	0.0953859	0.275489	1778.95
303	12	20	2016-06-11	3	0.340855	1.99419	916.839	0.000372996	-0.00433071	229.144	0.0143676	0.235682	2367.45
304	13	20	2016-06-11	3	0.335417	1.99938	960.202	0.00465264	0.0537008	288.248	0.00353305	-0.0410208	2170.47
305	14	20	2016-06-11	3	0.337233	1.99938	754.468	-0.00648817	0.0407087	-158.779	0.0413558	0.477329	2562.15
306	1	40	2016-06-11	3	0.367868	1.99419	1782.15	0.0265122	0.0580315	689.917	-0.0363271	0.227927	-889
307	2	40	2016-06-11	3	0.378557	2.07387	1754.87	0.0237736	0.0649607	659.668	0.144359	0.315983	3756.62
308	3	40	2016-06-11	3	0.381423	2.03403	2046.49	0.0241662	-0.00866142	480.529	0.144858	0.395821	4019.52
309	4	40	2016-06-11	3	0.408779	2.03576	2116.08	0.0124267	-0.0433071	533.632	0.147349	-0.0528112	2929.93
310	5	40	2016-06-11	3	0.361517	2.06694	1737.52	-0.000157051	0.00519685	329.229	0.0738056	-0.257213	3169.4
311	6	40	2016-06-11	3	0.338156	2.00198	1073.5	0.00158033	-0.00692914	346.298	-0.00108293	0.0358344	2270.17
312	7	40	2016-06-11	3	0.342641	2.00285	1621.93	0.00149198	0.0476378	265.318	0.0116525	-0.0510918	2553.42
313	8	40	2016-06-11	3	0.342406	2.00285	2038.41	0.00399499	0.0744882	198.695	0.0115209	0.367854	2048.76
314	9	40	2016-06-11	3	0.350337	2.02104	1270.92	6.87098e-05	-0.0147244	-145.291	0.0299425	0.55829	1489.22
315	10	40	2016-06-11	3	0.337292	2.04615	1345.49	-0.000402443	-0.0571654	-189.848	0.000486587	-0.104275	-1028.92
316	11	40	2016-06-11	3	0.358769	2.04442	1421.09	0.00389683	-0.00259843	333.827	-0.00336849	-0.47848	-1589.05
317	12	40	2016-06-11	3	0.342386	2.0193	1169.15	0.000932491	0.0112598	200.237	0.0365637	-0.0243809	3132.28
318	13	40	2016-06-11	3	0.33579	1.99505	1189.35	-0.000863781	-0.00346457	103.612	0.00883262	0.106654	1896.66
319	14	40	2016-06-11	3	0.341886	2.05308	1042.72				-0.00767787	-0.0307954	920.974
320	1	60	2016-06-11	3	0.36138	2.03489	1623.37							0.140142	0.310369	6175.39
321	2	60	2016-06-11	3	0.405069	2.1319	2444.79							0.366484	0.712141	10947
322	3	60	2016-06-11	3	0.405197	2.09899	2706.16							0.413462	0.533039	13479.9
323	4	60	2016-06-11	3	0.432946	2.0271	2596.61							0.577604	0.242932	12232.3
324	5	60	2016-06-11	3	0.373944	2.02363	2271.16							0.219843	0.246925	10319.2
325	6	60	2016-06-11	3	0.337999	2.00718	1402.73							0.0226739	-0.0537516	6555.14
326	7	60	2016-06-11	3	0.344222	1.99592	1968.23							0.0443663	0.0702512	7715.7
327	8	60	2016-06-11	3	0.343898	2.05048	2303.72							0.0410812	0.514995	6103.22
328	9	60	2016-06-11	3	0.354332	2.09552	1469.61							0.14368	0.55829	6412.77
329	10	60	2016-06-11	3	0.337361	2.03143	1200.2							0.0326709	0.355762	5108.66
330	11	60	2016-06-11	3	0.358366	1.98726	1231.25							0.189293	-0.311737	3627.52
331	12	60	2016-06-11	3	0.346283	2.0167	1502.98							0.127651	0.121904	8246.11
332	13	60	2016-06-11	3	0.336722	2.00631	1389.58							-0.00427685	-0.1969	6200.78
333	14	60	2016-06-11	3	0.341022	2.04962	1146.33							0.0597652	0.238665	5191.61
334	1		2016-06-11		0.368987	2.06434	1536.8																				Surface water headspace
335	2		2016-06-11		0.389757	2.03489	2735.43																				Surface water headspace
336	3		2016-06-11		0.564309	2.03316	2341.24																				Surface water headspace
337	4		2016-06-11		0.752721	2.0297	2001.53																				Surface water headspace
338	5		2016-06-11		0.806178	1.97426	3291.16																				Surface water headspace
339	6		2016-06-11		0.693297	2.05568	1328.04																				Surface water headspace
340	7		2016-06-11		0.390895	2.05741	1313.69																				Surface water headspace
341	8		2016-06-11		0.55043	2.07214	1728.24																				Surface water headspace
342	9		2016-06-11		1.48804	2.073	1312.51																				Surface water headspace
343	10		2016-06-11		0.901566	2.05395	1556.96																				Surface water headspace
344	11		2016-06-11		1.7418	2.05568	1377.2																				Surface water headspace
345	12		2016-06-11		0.489082	2.09293	1690.63																				Surface water headspace
346	13		2016-06-11		0.399268	2.09119	1441.85																				Surface water headspace
347	14		2016-06-11		0.456503	2.06434	1028.61	0.0161959	-0.00346457	692.597																	Surface water headspace
348	1	0	2016-06-12	1	0.335515	2.01324	521.447	0.01491	0.235591	-138.273	0.0906804	-0.019398	3877.83
349	2	0	2016-06-12	1	0.339225	1.95954	888.284	0.029182	-0.00433071	1044.8	0.0811855	1.2828	-752.9
350	3	0	2016-06-12	1	0.339814	2.02104	1073.73	0.0457019	-0.0407087	503.899	0.177813	-0.0263881	6366.2
351	4	0	2016-06-12	1	0.340786	2.01411	691.123	0.677037	-0.0355118	1435.29	0.278658	-0.248213	3072.42
352	5	0	2016-06-12	1	0.375426	2.02363	677.196	0.0231748	-0.0519685	532.414	4.02112	-0.210915	8524.6
353	1	20	2016-06-12	1	0.351711	2.00978	1214.04	0.180628	-0.238189	1126.53	0.129755	-0.290971	2980.97
354	2	20	2016-06-12	1	0.354136	2.19513	750.011	0.0427081	0.0329134	1311.02	0.983526	-1.29695	6134.01
355	3	20	2016-06-12	1	0.368996	2.0167	2118.53	0.293715	-0.00259843	766.694	0.260231	0.200549	7988.35
356	4	20	2016-06-12	1	0.386488	1.9734	1195.02	0.299771	0.0259843	874.147	1.79087	-0.0158434	4674.76
357	5	20	2016-06-12	1	1.05246	1.98812	2112.49	0.0337856	0.0337795	587.698	1.78043	0.154328	5191.81
358	1	40	2016-06-12	1	0.374886	1.95781	1746.46	0.221972	0.0874803	471.53	0.189165	0.189131	3290.51
359	2	40	2016-06-12	1	0.534764	1.95694	1876.55	0.0410689	0.0788189	637.134	1.20864	0.476333	2567.49
360	3	40	2016-06-12	1	0.411705	2.04962	3429.54	0.315192	0.0129921	654.69	0.250242	0.480263	3882.21
361	4	40	2016-06-12	1	0.680203	1.9708	1961.72	0.21039	-0.00433071	774.517	1.92182	0.0792168	3991.84
362	5	40	2016-06-12	1	1.35223	2.01411	2986.63				1.24956	-0.0257213	4600.08
363	1	60	2016-06-12	1	0.408672	1.99159	2334.16							0.409601	-0.121238	10149.3
364	2	60	2016-06-12	1	0.756736	2.04442	2348.08							2.27335	0.462184	7948.6
365	3	60	2016-06-12	1	0.452773	2.12844	4066.68							0.688286	0.654424	18236.8
366	4	60	2016-06-12	1	0.995395	1.98379	2616.41							3.99134	-0.184839	11739
367	5	60	2016-06-12	1	1.56262	2.00978	3761.15	0.0507864	0.030315	567.649				7.05111	-0.0823083	18316.5
368	1	0	2016-06-12	2	0.342818	1.98899	574.638	0.351981	0.0225197	842.319	0.284352	0.169733	3178.25
369	2	0	2016-06-12	2	0.354401	1.97686	629.846	0.0479889	0.0277165	694.485	1.91654	0.12262	4586.45
370	3	0	2016-06-12	2	0.339137	1.9656	506.553	0.138283	0.0329134	898.988	0.292408	0.168884	4231.66
371	4	0	2016-06-12	2	0.345881	1.97859	616.839	0.0720962	0.00952756	592.514	0.843155	0.200683	5481.39
372	5	0	2016-06-12	2	0.340688	1.976	698.908	0.0488723	-0.0381103	442.402	0.428201	0.056587	3519.11
373	1	20	2016-06-12	2	0.393604	2.0193	1142.29	0.232337	-0.0147244	702.138	0.273635	-0.213378	2477
374	2	20	2016-06-12	2	0.706381	1.99938	1472.17	0.0510416	0.0285827	761.349	1.26508	-0.0801748	3823.16
375	3	20	2016-06-12	2	0.387126	1.99332	1201.04	0.103546	0.00259843	704.053	0.311009	0.174161	4639.08
376	4	20	2016-06-12	2	0.484164	2.01151	1515.83	0.101543	0.0138583	818.785	0.631349	0.0158434	4292.82
377	5	20	2016-06-12	2	0.412784	1.98552	1291.42	0.0349242	0.018189	356.236	0.603095	0.0823083	4863
378	1	40	2016-06-12	2	0.442477	1.98119	1584.69	0.0363279	0.0329134	206.833	0.19554	0.10184	1994.56
379	2	40	2016-06-12	2	0.938719	1.98466	2174.3	0.0147137	0.0381103	190.679	0.197806	0.179214	1126.21
380	3	40	2016-06-12	2	0.438168	2.0219	1962.39	0.0471644	-0.0407087	558.674	0.0896543	0.232215	1161.85
381	4	40	2016-06-12	2	0.58771	2.01411	2219.88	0.0389585	0.0918111	473.102	0.287575	-0.248213	3406.4
382	5	40	2016-06-12	2	0.514328	1.99938	2110.21				0.231386	0.545293	2809.89
383	1	60	2016-06-12	2	0.477401	1.99938	1940.93							0.753527	0.0581941	7649.81
384	2	60	2016-06-12	2	0.975047	2.01757	2381.14							3.37943	0.22166	9535.82
385	3	60	2016-06-12	2	0.452881	2.06001	2153.07							0.693071	0.57526	10032.6
386	4	60	2016-06-12	2	0.634874	1.9734	2778.55							1.76208	-0.0316867	13180.6
387	5	60	2016-06-12	2	0.553286	2.09119	2583.31	0.0176093	-0.0233858	411.86				1.26268	0.684188	11192
388	1	0	2016-06-12	3	0.338745	2.00545	512.561	0.0305464	0.0199213	655.283	0.0985943	-0.130937	2306
389	2	0	2016-06-12	3	0.34005	1.96993	550.143	0.0218203	-0.0441732	553.516	0.166326	0.108472	3568.03
390	3	0	2016-06-12	3	0.337714	2.03056	573.166	0.0170793	-0.00952756	453.905	0.132956	-0.269158	3372.71
391	4	0	2016-06-12	3	0.338882	1.99245	830.556	0.0203577	0.0251181	499.28	0.104138	-0.0580923	2767.59
392	5	0	2016-06-12	3	0.33687	1.96907	721.796	0.0186891	0.00779528	491.224	0.120911	0.149184	2965.37
393	1	20	2016-06-12	3	0.356354	1.98206	924.422	0.040902	-0.012126	708.108	0.10464	0.0436456	2750.35
394	2	20	2016-06-12	3	0.370596	1.98985	1205.43	0.0179922	0.0285827	588.595	0.222712	-0.0660263	3855.66
395	3	20	2016-06-12	3	0.359534	1.98639	1126.68	0.0180412	0	677.616	0.109631	0.174161	3586.45
396	4	20	2016-06-12	3	0.355961	1.98293	1284.46	0.0215847	0.054567	700.437	0.110003	0	4131.62
397	5	20	2016-06-12	3	0.357227	1.99419	1221.08	0.0163137	-0.012126	470.877	0.128198	0.324089	4160.1
398	1	40	2016-06-12	3	0.375043	1.98985	1415.65	0.012034	0.0216536	490.839	0.0913399	-0.0678931	2636.43
399	2	40	2016-06-12	3	0.411498	1.97773	1913.53	0.0121322	0.0251181	535.451	0.0655256	0.117904	2672.63
400	3	40	2016-06-12	3	0.377526	2.01497	1715.28	0.0264238	0.0129921	806.296	0.0739244	0.153051	3262.63
401	4	40	2016-06-12	3	0.374002	1.98293	1962.08	0.00843168	0.0216536	404.658	0.161114	0.0792168	4916.22
402	5	40	2016-06-12	3	0.378812	2.04875	1921.51				0.0500782	0.128607	2403.38
403	1	60	2016-06-12	3	0.391357	1.97773	1886.52							0.294574	-0.155184	7692.77
404	2	60	2016-06-12	3	0.423532	1.99938	2404.37							0.454564	0.16035	10096.3
405	3	60	2016-06-12	3	0.389659	2.04009	2250.73							0.316511	0.0580537	10221.8
406	4	60	2016-06-12	3	0.400426	1.99592	2768.37							0.375254	0.0211245	11815.4
407	5	60	2016-06-12	3	0.387244	2.07041	2326.17	0.0264042	-0.000866142	218.021				0.299187	0.601879	9528.85
408	6	0	2016-06-14	1	0.341679	1.9656	568.406	0.0187774	0.018189	447.497	0.182068	-0.00597241	1503.34
409	7	0	2016-06-14	1	0.338234	1.95867	633.438	0.0170695	-0.0155906	353.327	0.138455	0.134116	3299.6
410	8	0	2016-06-14	1	0.33896	1.97946	607.556	0.0178351	-0.0138583	430.658	0.131809	-0.120389	2728.35
411	9	0	2016-06-14	1	0.34007	1.97686	567.616	0.0231454	-0.000866142	364.781	0.133674	-0.103868	3227.79
412	10	0	2016-06-14	1	0.338381	1.96474	576.298	0.00953104	0.0233858	197.97	0.16391	-0.00613382	2583.3
413	11	0	2016-06-14	1	0.337302	1.9682	582.522	0.0122696	0.0511024	325.23	0.0797758	0.195742	1657.03
414	12	0	2016-06-14	1	0.338381	1.95867	533.318	0.00847094	0.0103937	285.199	0.115125	0.479491	3051.62
415	13	0	2016-06-14	1	0.338529	1.976	901.587	0.0138107	0.00173228	138.305	0.0802374	0.0984499	2701.43
416	14	0	2016-06-14	1	0.338224	1.97426	548.91	0.0200731	0.000866142	279.708	0.122759	0.0153977	1229.35
417	6	20	2016-06-14	1	0.368084	1.96474	786.426	0.00961938	0.00952756	366.035	0.138412	0.00597241	1928.7
418	7	20	2016-06-14	1	0.357012	1.97686	1080.94	0.016294	0.00433071	418.156	0.0709282	0.0702512	2698.95
419	8	20	2016-06-14	1	0.35603	1.96387	960.883	0.0110623	0.0199213	426.629	0.125821	0.0334413	3228.95
420	9	20	2016-06-14	1	0.357905	1.963	998.274	0.00984514	0.0164567	345.113	0.0829119	0.14931	3197.59
421	10	20	2016-06-14	1	0.361527	1.96387	941.079	0.021781	-0.018189	324.921	0.069721	0.116543	2444.01
422	11	20	2016-06-14	1	0.346833	1.99159	780.492	0.00526121	-0.0233858	247.268	0.182309	-0.152244	2719.62
423	12	20	2016-06-14	1	0.350651	2.00978	858.548	0.0033766	-0.018189	89.3567	0.0493656	-0.219428	2320.1
424	13	20	2016-06-14	1	0.347	1.98639	1186.79	0.0120046	-0.00779528	260.939	0.0319834	-0.172287	846.393
425	14	20	2016-06-14	1	0.352035	1.976	687.215	0.0146057	0.00346457	178.589	0.106705	-0.0692897	2319.4
426	6	40	2016-06-14	1	0.388157	1.9656	1066.13	0.00173738	-0.00952756	361.769	0.100713	0.0238896	1231.44
427	7	40	2016-06-14	1	0.366631	1.98639	1446.97	0.00887338	-0.00866142	247.806	0.0128105	-0.0702512	2667.49
428	8	40	2016-06-14	1	0.372324	1.9682	1379.04	0.00412259	-0.0199213	216.893	0.0685193	-0.0668825	1913.53
429	9	40	2016-06-14	1	0.368967	1.98293	1424.9	0.00253245	-0.00259843	170.725	0.0308989	-0.14931	1625.62
430	10	40	2016-06-14	1	0.371372	1.98033	1286.19	-0.0098844	-0.0173228	263.616	0.0179342	-0.0184015	1209.04
431	11	40	2016-06-14	1	0.368614	1.9734	1105.41	0.00497656	-0.018189	220.827	-0.0827335	-0.144994	2206.5
432	12	40	2016-06-14	1	0.355912	1.98639	1105.82	0.00121715	-0.0103937	189.345	0.0466947	-0.170666	2072.01
433	13	40	2016-06-14	1	0.350376	1.9682	1276.14	0.0011288	0.0190551	135.147	0.0115289	-0.0984499	1793.49
434	14	40	2016-06-14	1	0.36404	1.9682	948.154				0.0100336	0.169375	1201.28
435	6	60	2016-06-14	1	0.402762	1.96907	1244.72							0.421193	0.0238896	4663.49
436	7	60	2016-06-14	1	0.368368	1.97686	1808.74							0.222193	0.134116	8666.04
437	8	60	2016-06-14	1	0.381197	1.95954	1626.84							0.326149	-0.15383	7870.83
438	9	60	2016-06-14	1	0.37309	1.963	1641.8							0.247485	-0.103868	8050.99
439	10	60	2016-06-14	1	0.373904	1.97773	1456.92							0.251566	0.0920073	6236.34
440	11	60	2016-06-14	1	0.358729	1.95607	1369.03							0.179352	-0.101496	6583.15
441	12	60	2016-06-14	1	0.360889	1.9682	1326.64							0.211185	0.0893966	7443.72
442	13	60	2016-06-14	1	0.351593	1.95781	1465.49							0.12375	-0.172287	5341.31
443	14	60	2016-06-14	1	0.365168	1.98726	1083.3	0.00214964	0.0337795	311.899				0.239497	0.115483	4750.03
444	6	0	2016-06-14	2	0.338774	1.95607	2072.56	0.00467227	0.286693	358.522	0.0148226	0.232924	2150.67
445	7	0	2016-06-14	2	0.337763	1.97167	629.503	0.00214964	0.00173228	254.819	0.0344508	2.11392	2643.55
446	8	0	2016-06-14	2	0.337361	1.96041	696.856	0.00391646	-0.00606299	229.495	0.0165992	0.0133765	1967.68
447	9	0	2016-06-14	2	0.337341	1.98379	1175.82	0.00122696	0.0666929	303.276	0.0293539	-0.0454422	1720.07
448	10	0	2016-06-14	2	0.338872	1.963	614.237	0.00528084	-0.0320473	216.005	0.00868906	0.472304	2147.73
449	11	0	2016-06-14	2	0.336585	2.02017	689.638	-0.00612499	0.0103937	301.026	0.0442012	-0.268239	1807.99
450	12	0	2016-06-14	2	0.337812	1.95954	595.09	0.00102083	0.0103937	168.947	-0.0574704	0.0975235	2824.51
451	13	0	2016-06-14	2	0.337135	1.97513	706.963	-0.000294471	-0.0372441	191.014	0.00966939	0.0984499	1600.28
452	14	0	2016-06-14	2	0.337802	2.00804	576.07	-0.000932491	-0.0389764	-56.8367	-0.00261746	-0.331051	1697.86
453	6	20	2016-06-14	2	0.340924	1.98985	2384.46	-0.0011288	-0.293622	413.517	-0.00642991	-0.268758	-391.912
454	7	20	2016-06-14	2	0.342435	2.25836	988.025	0.00298397	0.0103937	363.673	-0.00832321	-2.16501	3049.06
455	8	20	2016-06-14	2	0.33951	1.96214	951.675	0.00210056	0.00519685	339.406	0.0230419	0.080259	2808.24
456	9	20	2016-06-14	2	0.341257	1.97773	1405.32	0.00319992	-0.0277165	353.107	0.0157437	0.0389505	2543.85
457	10	20	2016-06-14	2	0.340099	2.0297	917.512	0.00244411	0.0129921	186.486	0.0226611	-0.196282	2500.62
458	11	20	2016-06-14	2	0.341866	1.98812	905.644	0.012142	0.00866142	173.337	0.0204574	0.108745	1560.91
459	12	20	2016-06-14	2	0.331687	1.96993	896.115	0.00158033	-0.000866142	237.687	0.113928	0.0812696	1626.41
460	13	20	2016-06-14	2	0.338156	1.98552	875.91	0.00467227	-0.00433071	256.345	0.014969	-0.00820416	2251.38
461	14	20	2016-06-14	2	0.337508	1.9708	767.084	-0.00285637	-0.0259843	503.106	0.0415303	-0.0384943	2278.57
462	6	40	2016-06-14	2	0.339991	1.95088	2327.63	0.00426983	0.00866142	312.334	-0.0196958	-0.179172	3469.12
463	7	40	2016-06-14	2	0.341306	1.96474	1401.54	-0.000471153	-0.0147244	425.487	0.0314834	0.0638647	2302.98
464	8	40	2016-06-14	2	0.342494	1.97253	1315.35	0.00217908	-0.0225197	198.918	-0.00363819	-0.1137	3285.56
465	9	40	2016-06-14	2	0.343358	1.98293	1744.72	0.000657651	-0.0337795	371.078	0.0163323	-0.168785	1490.89
466	10	40	2016-06-14	2	0.343299	2.00198	1270.62	0.00737158	-0.0164567	355.02	0.00465734	-0.239219	2627.89
467	11	40	2016-06-14	2	0.34431	2.00111	1092.13	0.00120733	-0.0147244	342.702	0.0617009	-0.137744	2971.55
468	12	40	2016-06-14	2	0.343829	1.97859	1069.45	-0.000235577	-0.00519685	337.081	0.0113283	-0.138158	3215.56
469	13	40	2016-06-14	2	0.339736	1.98466	1113.6	0.00214964	0.0147244	171.524	-0.0022314	-0.049225	3192.86
470	14	40	2016-06-14	2	0.34218	1.96647	1023.43				0.0191074	0.130881	1524.62
471	6	60	2016-06-14	2	0.337135	1.92489	2830.73							-0.0113031	-0.215007	5227.88
472	7	60	2016-06-14	2	0.345576	1.9734	1713.88							0.0576111	0.0127729	7995.59
473	8	60	2016-06-14	2	0.342023	1.95781	1740.84							0.0360029	-0.0200648	8061.49
474	9	60	2016-06-14	2	0.345537	1.96041	1943.64							0.0614299	-0.175277	5754.8
475	10	60	2016-06-14	2	0.343957	1.9682	1641.7							0.0360075	0.0368029	7276.24
476	11	60	2016-06-14	2	0.351682	1.98466	1447.15							0.12636	-0.297238	6340.45
477	12	60	2016-06-14	2	0.345036	1.96387	1412.15							0.0677857	0.0406348	7666.47
478	13	60	2016-06-14	2	0.3395	1.97946	1450.68							0.022407	0.0410208	7044.52
479	14	60	2016-06-14	2	0.34433	1.98119	1194.95	0.00070673	0.00779528	300.279				0.0580203	-0.238665	5501.06
480	6	0	2016-06-14	3	0.338892	1.95348	540.096	0.00178646	-0.00952756	359.899	0.00487319	0.0537516	2070.55
481	7	0	2016-06-14	3	0.338048	1.95174	781.943	0.002503	0.00866142	361.786	0.0131724	-0.0702512	2653.71
482	8	0	2016-06-14	3	0.337145	1.9656	631.368	0.00249319	0	401.714	0.0193279	0.0668825	2793.67
483	9	0	2016-06-14	3	0.337724	1.963	617.941	0.00220853	-0.0112598	390.186	0.0186865	0	3010.85
484	10	0	2016-06-14	3	0.338843	1.9734	772.19	0.00299379	0.00779528	318.891	0.0156403	-0.0797397	2763.21
485	11	0	2016-06-14	3	0.338372	1.9656	568.652	0.00495692	-0.0103937	312.276	0.0250583	0.0652473	2669.15
486	12	0	2016-06-14	3	0.338911	1.95867	798.609	-0.00272876	0.000866142	311.175	0.0465105	-0.0975235	2930.06
487	13	0	2016-06-14	3	0.339343	1.95607	561.481	-1.96314e-05	-0.00173228	301.409	-0.025847	0.00820416	2947.47
488	14	0	2016-06-14	3	0.340295	1.95781	618.141	-0.00127604	0.000866142	238.329	-0.000174497	-0.0153977	2679.13
489	6	20	2016-06-14	3	0.339598	1.96127	840.375	0.00433854	0.0129921	404.557	-0.00879882	0.00597241	1643.37
490	7	20	2016-06-14	3	0.339834	1.94222	1141.84	0.00164904	-0.00952756	276.36	0.0319901	0.0957971	2982.99
491	8	20	2016-06-14	3	0.339648	1.97426	993.154	-0.000314102	-0.00346457	321.2	0.0127337	-0.0735708	2134.02
492	9	20	2016-06-14	3	0.340217	1.963	1019.65	-0.00247355	-0.00346457	161.162	-0.0023542	-0.025967	2407.4
493	10	20	2016-06-14	3	0.341051	1.96214	1162.38	0.00747956	-0.00519685	141.428	-0.0175171	-0.0245353	1141.31
494	11	20	2016-06-14	3	0.341365	1.9734	887.543	-0.00120733	0.0129921	177.172	0.0626047	-0.0434982	1183.77
495	12	20	2016-06-14	3	0.343868	1.94828	1110.88	0.000127604	0.012126	141.43	-0.0113283	0.121904	1662.39
496	13	20	2016-06-14	3	0.336615	1.95694	872.656	0.00295452	0.000866142	173.762	0.00120867	0.114858	1339.63
497	14	20	2016-06-14	3	0.340276	1.95607	919.549	0.000265024	-0.0155906	190.59	0.0262618	0.00769886	1544.51
498	6	40	2016-06-14	3	0.338322	1.96214	1078.7	-0.00512379	0	341.227	0.00182745	-0.107503	1314.2
499	7	40	2016-06-14	3	0.344173	1.95521	1546.4	0.0015018	-0.000866142	206.043	-0.0377801	0	2516.03
500	8	40	2016-06-14	3	0.341297	1.96474	1269.51	0.00564402	0.0173228	196.85	0.0115967	-0.00668825	1591.04
501	9	40	2016-06-14	3	0.339903	1.95954	1340.85	0.00478024	0.0355118	362.929	0.042302	0.129835	1475.39
502	10	40	2016-06-14	3	0.338578	1.95867	1323.54	0.00479987	0.00346457	273.684	0.0338526	0.251487	2570.18
503	11	40	2016-06-14	3	0.348845	1.9682	1028.97	0.00321955	-0.00692914	259.334	0.0401754	0.0289988	2290.76
504	12	40	2016-06-14	3	0.342661	1.96127	1288.06	-0.000157051	0	233.543	0.0302088	-0.0650157	2433.31
505	13	40	2016-06-14	3	0.336742	1.96907	1014.09	0.00141346	0.024252	149.192	-0.0014876	0	2212.13
506	14	40	2016-06-14	3	0.34323	1.95694	1093.31				0.0125638	0.215568	1326.12
507	6	60	2016-06-14	3	0.338587	1.94655	1269.29							-0.00209818	-0.0477792	5028.12
508	7	60	2016-06-14	3	0.339049	1.95521	1887.63							0.00738232	0.0255459	8152.72
509	8	60	2016-06-14	3	0.342798	1.96387	1475.56							0.0436583	-0.0133765	6518.72
510	9	60	2016-06-14	3	0.345547	1.97686	1537.7							0.0586343	0.103868	6893.64
511	10	60	2016-06-14	3	0.343358	1.99419	1686.47							0.0319757	0.147212	6474.7
512	11	60	2016-06-14	3	0.353645	1.97167	1302.65							0.127838	0.0507479	6143.68
513	12	60	2016-06-14	3	0.345881	1.95434	1547.39							0.0653911	-0.0406348	7025.77
514	13	60	2016-06-14	3	0.336585	1.96907	1247.63							-0.026126	0.123062	6499.23
515	14	60	2016-06-14	3	0.344644	1.98119	1242.5							0.0386511	0.207869	5549.75
516	1				0.553355	2.01757	1990.34
517	2				0.4093	2.06781	3154.33
518	3				0.720712	2.03143	1492.74
519	4				0.525998	2.07647	1600.9
520	5				0.389236	2.06521	2022.7	0.0479202	0.00866142	863.14
521	1	0	2016-06-15	1	0.33953	2.00891	751.336	0.0462123	-0.0147244	583.705	0.268304	0.0484951	4832.7
522	2	0	2016-06-15	1	0.340011	2.02796	735.775	0.0195332	-0.0103937	839.215	0.251627	-0.0801748	3178.29
523	3	0	2016-06-15	1	0.335898	2.03316	763.336	0.0717331	-0.0112598	745.298	0.119021	-0.0633314	5113.54
524	4	0	2016-06-15	1	0.340276	2.00285	678.726	0.00917767	0.0355118	468.002	0.437378	-0.0686546	4544.3
525	5	0	2016-06-15	1	0.335564	2.0297	554.182	-0.019922	-0.503926	-0.0106077	0.0545088	0.210915	2779.6
526	CTRL	0	2016-06-15	1	2.07993	635.81	0.310518	0.0477828	-0.00433071	449.047	-0.185636	-4.69565	-0.098844
527	1	20	2016-06-15	1	0.38745	2.01757	1614.48	0.0340114	0.0129921	259.221	0.267535	-0.0242475	2514.2
528	2	20	2016-06-15	1	0.386223	2.01324	1319.48	0.0281318	0.0450394	500.732	0.185193	0.0707425	1411.46
529	3	20	2016-06-15	1	0.355431	2.02277	1602.55	0.0796151	0.0285827	548.578	0.171414	0.274436	3051.08
530	4	20	2016-06-15	1	0.412009	1.99159	1424.02	0.0931215	-0.0684252	874.026	0.485436	0.174277	3344.84
531	5	20	2016-06-15	1	0.344742	2.06521	1022.18	0	21.7109	0.00309112	0.553075	-0.406397	5191.09
532	CTRL	20	2016-06-15	1	2.06001	635.306	0.299911	0.0495103	0.012126	358.01	0	202.305	0.0288034
533	1	40	2016-06-15	1	0.435233	2.01324	2063.52	0.0644204	-0.0103937	395.563	0.277207	0.0678931	2004.49
534	2	40	2016-06-15	1	0.420234	2.02623	1578.7	0.0488527	0.155039	791.247	0.350771	-0.056594	2153.85
535	3	40	2016-06-15	1	0.383563	2.06781	2103.28	0.110907	0.0337795	559.735	0.297671	0.944693	4821.26
536	4	40	2016-06-15	1	0.491624	2.02017	1972.6	-0.0571568	0.0727559	-109.08	0.676235	0.205964	3412.87
537	5	40	2016-06-15	1	0.437863	1.99678	1896.21	0.006063	-0.311996	-0.00264953	-0.339471	0.432119	-647.857
538	CTRL	40	2016-06-15	1	2.06001	657.017	0.303002				0.0564958	-2.90722	-0.0246886
539	1	60	2016-06-15	1	0.484743	2.02537	2421.53							0.813046	0.0921407	9351.39
540	2	60	2016-06-15	1	0.484655	2.01584	1974.26							0.78759	-0.0660263	6743.6
541	3	60	2016-06-15	1	0.432416	2.22285	2894.53							0.588106	1.1558	12985.9
542	4	60	2016-06-15	1	0.602531	2.05395	2532.34							1.59905	0.311586	11302
543	5	60	2016-06-15	1	0.380707	2.06954	1787.13							0.268114	0.236636	7322.84
544	CTRL	60	2016-06-15	1	2.06607	656.705	0.300352	0.0543495	0.0450394	481.939				-0.12914	194.702	-0.0947293
545	1	0	2016-06-15	2	0.340531	2.00631	632.347	0.193997	0.0675591	450.095	0.304301	0.252174	2698.37
546	2	0	2016-06-15	2	0.357581	2.01497	933.033	0.0649308	0.0155906	514.389	1.05632	0.367861	2450.78
547	3	0	2016-06-15	2	0.337724	2.0245	791.572	0.110505	-0.00173228	750.273	0.395639	0.094997	3134.3
548	4	0	2016-06-15	2	0.343947	2.03749	779.438	0.0593359	0.030315	418.755	0.673782	-0.0105622	4574.64
549	5	0	2016-06-15	2	0.341758	2.00285	1311.99	0.0514833	-0.0207874	568.094	0.352413	0.180049	2487.11
550	1	20	2016-06-15	2	0.39488	2.05135	1114.29	0.142259	-0.0588977	408.483	0.288254	-0.116388	3180.75
551	2	20	2016-06-15	2	0.551578	2.08253	1383.13	0.0590217	0.00692914	656.598	0.774603	-0.320699	2224.2
552	3	20	2016-06-15	2	0.402654	2.04009	1305.96	0.0737649	0.00259843	601.407	0.359634	0.0422209	4000.81
553	4	20	2016-06-15	2	0.454452	2.03576	1529.71	0.0468797	0.00433071	414.591	0.449766	0.0158434	3666.96
554	5	20	2016-06-15	2	0.401094	2.03316	1730.74	0.0539569	0.0147244	540.393	0.278432	0.0257213	2462.38
555	1	40	2016-06-15	2	0.446364	2.03056	1682.38	0.145135	0.018189	335.453	0.302103	0.0824416	3025.65
556	2	40	2016-06-15	2	0.693837	2.02363	1791.61	0.0553899	0.0528347	553.255	0.790263	0.0990395	1826.55
557	3	40	2016-06-15	2	0.461676	2.04702	1962.56	0.0638805	0.0268504	552.321	0.337504	0.321934	3371.12
558	4	40	2016-06-15	2	0.528217	2.03836	2131.12	0.0584426	-0.00433071	647.539	0.389498	0.163715	3367.66
559	5	40	2016-06-15	2	0.447974	2.03749	2145.33				0.347108	-0.0257213	3845.92
560	1	60	2016-06-15	2	0.500321	2.04529	2222.77							0.894658	0.218228	8904.76
561	2	60	2016-06-15	2	0.838972	2.04182	2127.06							2.62119	0.146201	6501.53
562	3	60	2016-06-15	2	0.517066	2.09985	2515.81							1.09278	0.459152	10506.2
563	4	60	2016-06-15	2	0.592097	2.06521	2683.44							1.51305	0.168996	11609.3
564	5	60	2016-06-15	2	0.506416	2.03316	2792.87	0.02716	-0.00433071	568.263				0.977953	0.180049	8795.41
565	1	0	2016-06-15	3	0.33738	1.99332	532.72	0.134603	0.000866142	512.61	0.152068	-0.0242475	3181.69
566	2	0	2016-06-15	3	0.349198	1.976	595.109	0.0407842	0.0346457	705.456	0.732914	0.00471616	2791.18
567	3	0	2016-06-15	3	0.340197	1.97686	671.975	0.0393806	-0.0138583	738.003	0.248508	0.211105	4298.52
568	4	0	2016-06-15	3	0.341611	2.00285	758.521	0.0313808	0.0493701	496.08	0.240115	-0.084498	4499.82
569	5	0	2016-06-15	3	0.340001	1.99159	723.251	0.0198277	0.0407087	480.419	0.186379	0.293223	2946.36
570	1	20	2016-06-15	3	0.36454	1.98899	1100.98	0.119192	0.0147244	470.163	0.111015	0.227927	2689.85
571	2	20	2016-06-15	3	0.483801	1.97686	1107.72	0.0352481	0.0233858	666.518	0.649003	0.0801748	2560.05
572	3	20	2016-06-15	3	0.380981	2.01151	1377.43	0.0416872	0.00866142	569.968	0.214775	0.142496	4061.26
573	4	20	2016-06-15	3	0.380991	1.98899	1496.52	0.0366322	-0.0190551	582.19	0.254179	0.0528112	3475.26
574	5	20	2016-06-15	3	0.371382	2.04096	1219.33	0.0138499	-0.0277165	444.754	0.217569	-0.113174	3457.8
575	1	40	2016-06-15	3	0.384368	2.0297	1581.4	0.0943092	-0.00173228	512.433	0.0775455	-0.155184	2490.17
576	2	40	2016-06-15	3	0.602993	1.99159	1577.88	0.0209074	0.0225197	381.345	0.513516	-0.00943233	2790.21
577	3	40	2016-06-15	3	0.41623	2.03489	2043.95	0.0433657	-0.0147244	860.872	0.127394	0.137218	2323.63
578	4	40	2016-06-15	3	0.422678	1.99765	2066.49	0.01438	-0.0311811	417.168	0.264414	-0.0897791	5248.99
579	5	40	2016-06-15	3	0.408014	2.0219	1801.52				0.0854069	-0.185194	2477.68
580	1	60	2016-06-15	3	0.398218	2.00198	2026.16							0.340629	0.0484951	8361.71
581	2	60	2016-06-15	3	0.697302	1.98985	2090.32							1.89543	0.0754586	8141.43
582	3	60	2016-06-15	3	0.437137	2.05741	2425.29							0.590677	0.490818	10683.4
583	4	60	2016-06-15	3	0.466044	1.98293	2927.37							0.758708	-0.121466	13224.1
584	5	60	2016-06-15	3	0.422394	1.99072	2218.69							0.489355	-0.00514427	8881.84

## Sheet: Summary tables - gas flux
Table 1: Hourly CO2 flux - µmol m-2 hour-1
Location	Core No.	Background	Day 1			Day 2			Day 5
		Pre-flood	11:00:00	14:20:00	17:40:00	11:00:00	14:20:00	17:40:00	11:00:00	14:20:00	17:40:00
Low-Crown	1	21698.9	14179.4	6022.05	6175.39	10149.3	7649.81	7692.77	9351.39	8904.76	8361.71
Low-Crown	2	19556.3	13612.9	9545.23	10947	7948.6	9535.82	10096.3	6743.6	6501.53	8141.43
Low-Crown	3	16944.9	21299.4	12729.1	13479.9	18236.8	10032.6	10221.8	12985.9	10506.2	10683.4
Low-Crown	4	20158.7	15894.9	13561.3	12232.3	11739	13180.6	11815.4	11302	11609.3	13224.1
Low-Crown	5	18355	11492.4	9931	10319.2	18316.5	11192	9528.85	7322.84	8795.41	8881.84
Low-Crown	Mean	19342.7	15295.8	10357.7	10630.8	13278	10318.2	9871.04	9541.15	9263.44	9858.49
Low-Crown	Std. dev.	1611.73	3315.01	2665.56	2479.11	4255.24	1831.44	1327.88	2355.84	1733.39	1905.26
Mid-Crown	6	24998.6	5045.98	6428.45	6428.45	4607.33	4208.57	6555.14	4663.49	5227.88	5028.12
Mid-Crown	7	29013.3	6566.11	7702.92	7702.92	4960.55	6911.23	7715.7	8666.04	7995.59	8152.72
Mid-Crown	8	27890.4	10017.4	6858.32	6858.32	4811.11	6041.36	6103.22	7870.83	8061.49	6518.72
Mid-Crown	9	14949.2	8886.05	9875.62	9875.62	5098.42	4598.42	6412.77	8050.99	5754.8	6893.64
Mid-Crown	10	28292.6	10270	11022.4	11022.4	6487.96	5823.95	5108.66	6236.34	7276.24	6474.7
Mid-Crown	Mean	25028.8	8157.11	8377.54	8377.54	5193.07	5516.71	6379.1	7097.54	6863.2	6613.58
Mid-Crown	Std. dev.	5221.42	2033.06	1777.73	1777.73	667.647	986.794	837.705	1458.32	1165.47	998.934
High-Crown	11	25205.8	5639.48	9280.88	9280.88	3154.8	3309.88	3627.52	6583.15	6340.45	6143.68
High-Crown	12	22069.3	8918.57	11950.7	11950.7	2761.03	5752.66	8246.11	7443.72	7666.47	7025.77
High-Crown	13	21822.3	11013	8047.24	8047.24	4812.6	5033.46	6200.78	5341.31	7044.52	6499.23
High-Crown	14	20027	6756.27	5752.93	5752.93	2955.19	4316.16	5191.61	4750.03	5501.06	5549.75
High-Crown	Mean	22281.1	8081.83	8757.94	8757.94	3420.91	4603.04	5816.51	6029.55	6638.12	6304.61
High-Crown	Std. dev.	1863.46	2062.41	2236.2	2236.2	815.467	902.975	1675.77	1050.86	806.875	537.042
Table 2: Hourly CH4 flux (µmol m-2 hour-1)
Location	Core No.	Background	Day 1			Day 2			Day 5
		Pre-flood	11:00:00	14:20:00	17:40:00	11:00:00	14:20:00	17:40:00	11:00:00	14:20:00	17:40:00
Low-Crown	1	-10.8968	-0.135786	-0.252174	0.310369	-0.121238	0.0581941	-0.155184	0.0921407	0.218228	0.0484951
Low-Crown	2	-10.5359	-0.179214	0.198079	0.712141	0.462184	0.22166	0.16035	-0.0660263	0.146201	0.0754586
Low-Crown	3	-0.306102	-12.3866	-0.0369433	0.533039	0.654424	0.57526	0.0580537	1.1558	0.459152	0.490818
Low-Crown	4	-11.7558	-0.322148	-0.105622	0.242932	-0.184839	-0.0316867	0.0211245	0.311586	0.168996	-0.121466
Low-Crown	5	-11.5849	0.3138	0.180049	0.246925	-0.0823083	0.684188	0.601879	0.236636	0.180049	-0.00514427
Low-Crown	Mean	-9.01591	-2.54198	-0.00332237	0.409081	0.145645	0.301523	0.137245	0.346027	0.234525	0.0976323
Low-Crown	Std. dev.	4.37757	4.92689	0.171878	0.184854	0.343937	0.282128	0.253649	0.425	0.114705	0.207879
Mid-Crown	6	-13.5753	0.143338	0.674882	0.0477792	-0.0238896	-0.256813	-0.0537516	0.0238896	-0.215007	-0.0477792
Mid-Crown	7	-14.4909	0.114957	0	0.306551	-0.510918	0.0766377	0.0702512	0.134116	0.0127729	0.0255459
Mid-Crown	8	-15.0151	0.15383	0.15383	0.080259	-0.227401	-0.401295	0.514995	-0.15383	-0.0200648	-0.0133765
Mid-Crown	9	-0.025967	-0.136327	-0.285637	0.279145	-0.25967	-0.344062	0.55829	-0.103868	-0.175277	0.103868
Mid-Crown	10	-13.8195	0.159479	-0.318959	-0.582713	-0.0368029	-0.134944	0.355762	0.0920073	0.0368029	0.147212
Mid-Crown	Mean	-11.3854	0.0870553	0.0448232	0.0262042	-0.211736	-0.212095	0.289109	-0.00153696	-0.0721545	0.043094
Mid-Crown	Std. dev.	5.70221	0.112738	0.361222	0.321478	0.17773	0.170018	0.24223	0.110872	0.1028	0.0725104
High-Crown	11	-0.761218	0.507479	0.0434982	0.565477	-0.0072497	-0.536478	-0.311737	-0.101496	-0.297238	0.0507479
High-Crown	12	-0.528253	0.235682	-0.26819	0.406348	-0.0650157	-0.0406348	0.121904	0.0893966	0.0406348	-0.0406348
High-Crown	13	-0.500454	-0.451229	0.336371	-0.0656333	0.106654	-0.615312	-0.1969	-0.172287	0.0410208	0.123062
High-Crown	14	-0.384943	0.415738	0.0923863	0	-0.246363	-0.392642	0.238665	0.115483	-0.238665	0.207869
High-Crown	Mean	-0.543717	0.176918	0.0510163	0.226548	-0.0529937	-0.396267	-0.037017	-0.0172259	-0.113562	0.0852612
High-Crown	Std. dev.	0.13659	0.375609	0.215109	0.266409	0.12759	0.220299	0.224883	0.122602	0.155772	0.0915186
Table 4: Hourly CO2 flux - µmol m-2 hour-1
Location	Core No.	Background	Day 1			Day 2			Day 5
		Pre-flood	11:00:00	14:20:00	17:40:00	11:00:00	14:20:00	17:40:00	11:00:00	14:20:00	17:40:00
Low-Crown	1	21698.9	14179.4	6022.05	6175.39	10149.3	7649.81	7692.77	9351.39	8904.76	8361.71
Low-Crown	2	19556.3	13612.9	9545.23	10947	7948.6	9535.82	10096.3	6743.6	6501.53	8141.43
Low-Crown	3	16944.9	21299.4	12729.1	13479.9	18236.8	10032.6	10221.8	12985.9	10506.2	10683.4
Low-Crown	4	20158.7	15894.9	13561.3	12232.3	11739	13180.6	11815.4	11302	11609.3	13224.1
Low-Crown	5	18355	11492.4	9931	10319.2	18316.5	11192	9528.85	7322.84	8795.41	8881.84
Low-Crown	Mean	19342.7	15295.8	10357.7	10630.8	13278	10318.2	9871.04	9541.15	9263.44	9858.49
Low-Crown	Std. dev.	1611.73	3315.01	2665.56	2479.11	4255.24	1831.44	1327.88	2355.84	1733.39	1905.26
Mid-Crown	6	24998.6	5045.98	6428.45	6428.45	4607.33	4208.57	6555.14	4663.49	5227.88	5028.12
Mid-Crown	7	29013.3	6566.11	7702.92	7702.92	4960.55	6911.23	7715.7	8666.04	7995.59	8152.72
Mid-Crown	8	27890.4	10017.4	6858.32	6858.32	4811.11	6041.36	6103.22	7870.83	8061.49	6518.72
Mid-Crown	9	14949.2	8886.05	9875.62	9875.62	5098.42	4598.42	6412.77	8050.99	5754.8	6893.64
Mid-Crown	10	28292.6	10270	11022.4	11022.4	6487.96	5823.95	5108.66	6236.34	7276.24	6474.7
Mid-Crown	Mean	25028.8	8157.11	8377.54	8377.54	5193.07	5516.71	6379.1	7097.54	6863.2	6613.58
Mid-Crown	Std. dev.	5221.42	2033.06	1777.73	1777.73	667.647	986.794	837.705	1458.32	1165.47	998.934
High-Crown	11	25205.8	5639.48	9280.88	9280.88	3154.8	3309.88	3627.52	6583.15	6340.45	6143.68
High-Crown	12	22069.3	8918.57	11950.7	11950.7	2761.03	5752.66	8246.11	7443.72	7666.47	7025.77
High-Crown	13	21822.3	11013	8047.24	8047.24	4812.6	5033.46	6200.78	5341.31	7044.52	6499.23
High-Crown	14	20027	6756.27	5752.93	5752.93	2955.19	4316.16	5191.61	4750.03	5501.06	5549.75
High-Crown	Mean	22281.1	8081.83	8757.94	8757.94	3420.91	4603.04	5816.51	6029.55	6638.12	6304.61
High-Crown	Std. dev.	1863.46	2062.41	2236.2	2236.2	815.467	902.975	1675.77	1050.86	806.875	537.042

## Sheet: Headspace volume measurements
Headspace volumes
Core #	Volume (cm3)
1	1085.42
2	1055.58
3	1181.24
4	1182.02
5	1151.39
6	1336.75
7	1429.42
8	1496.97
9	1452.99
10	1372.88
11	1622.63
12	1818.98
13	1836.26
14	1723.16

## Sheet: Compaction calculations
Core #	Crown location	Distance from top of pipe to ground surface (cm)	Distance from top of pipe to inside soil surface (i.e. the surface of the soil core within the pipe) (cm)	Depth pipe was driven into soil (i.e. length of soil core if there were no compaction)	Length of compacted soil core in pipe	% compaction
1	low	9.4	12	30.6	28	8.49673
2	low	10.1667	10.9333	29.8333	29.0667	2.56983
3	low	10.75	11.5	29.25	28.5	2.5641
4	low	10.35	12	29.65	28	5.56492
5	low	10.75	10.85	29.25	29.15	0.34188
6	mid	9.7	14.5	30.3	25.5	15.8416
7	mid	10.9333	15.8	29.0667	24.2	16.7431
8	mid	10.7	16.5	29.3	23.5	19.7952
9	mid	10.6667	15	29.3333	25	14.7727
10	mid	9.73333	14.4	30.2667	25.6	15.4185
11	high	10.45	17.9	29.55	22.1	25.2115
12	high	11.25	20	28.75	20	30.4348
13	high	12.15	20.65	27.85	19.35	30.5206
14	high	13.6	18.9	26.4	21.1	20.0758
15	high	14	20.95	26	19.05	26.7308
NOTES:
All pipe sections were 40cm long
The % compaction is calculated by dividing the length of the core within the tube by the length of tube which was driven into the soil (i.e. it would be 0 if there was no compaction)
